# Supplementary material for: Are physiological and ecosystem-level tipping points caused by ocean acidification? A critical evaluation
Source: Copernicus journal article supplement (doi:10.5194/esd-15-671-2024), 2024-06-03
Supplement: Supplementary file 1 [file esd-15-671-2024-supplement.zip]

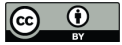

*Supplement of*

**Are physiological and ecosystem-level tipping points caused by ocean acidification? A critical evaluation**

**Christopher E. Cornwall et al.**

*Correspondence to:* Christopher E. Cornwall ([christopher.cornwall@vuw.ac.nz](mailto:christopher.cornwall@vuw.ac.nz))

- [esd-15-671-2024-supplement-title-page.pdf](#)
- [tipping points.Rmd](#)

The copyright of individual parts of the supplement might differ from the article licence.
